# Supplementary material for: Genomic alterations of Tenascin C in highly aggressive prostate cancer: a meta-analysis
Source: PubMed Central journal article supplement (PMC6872669; doi:10.18632/genesandcancer.196), 2019
Supplement: ganc-10-150-s001.pdf [file ganc-10-150-s001.pdf]

# Genomic alterations of Tenascin C in highly aggressive prostate cancer: a meta-analysis – Mishra et al

## Supplementary Figures

Tumor Samples with sequencing and CNA data (77 patients / 107 samples)  
Altered in 57 (74%) of 77 sequenced cases/patients (77 total)

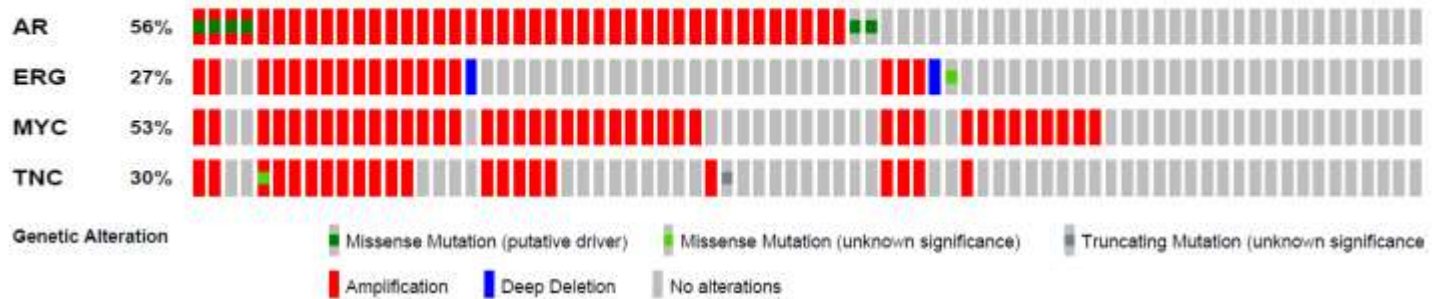

**Supplementary Figure 1: TNC alterations in NEPC.** OncoPrint representing the query for TNC along with AR, ERG and MYC among the neuroendocrine prostate cancer dataset ( $N = 104$ ). Number of samples with sequencing and CAN data were  $N = 77$ . Each row of the oncoprint represents the same set of patients for each of the queried gene, alteration frequency for the gene represented in percentage. Each rectangle box in the figure represents a patient sample/case. Genetic alterations are color coded: Amplification, red; Missense mutations, green; deep deletion, blue; No alterations, grey.

| STUDY_ID   | SAMPLE_ID       | TNC    | MVC    | AR      | ERG     | NOTCH1  | NOTCH3  | NOTCH2  | GSOX1   | GSOX2   | SOX2    | SOX9    | SOX13   | SOX14   | WNT3A   | WNT7A   | WNT5A   | WNT3    | WNT10   | WNT5A   |
|------------|-----------------|--------|--------|---------|---------|---------|---------|---------|---------|---------|---------|---------|---------|---------|---------|---------|---------|---------|---------|---------|
| prad_stage | TCGA-EC-AMBD-01 | NA     | NA     | NA      | NA      | NA      | NA      | NA      | NA      | NA      | NA      | NA      | NA      | NA      | NA      | NA      | NA      | NA      | NA      | NA      |
| prad_stage | TCGA-EC-AMBD-01 | 0.0078 | 0.0078 | -0.0822 | -0.3655 | 0.1035  | -0.0801 | 0.1789  | 0.7535  | -0.0288 | -0.0311 | -0.1011 | -0.3002 | -0.4374 | -0.0008 | 0.2213  | 0.1023  | -0.0367 | -0.5667 |         |
| prad_stage | TCGA-G9-7523-01 | 0.0148 | 0.0148 | -0.7614 | -0.3323 | -0.4674 | -1.4276 | -0.2877 | -0.0428 | 0.0454  | -0.7763 | -0.1191 | -0.0662 | -0.6395 | -0.5223 | -0.2779 | 0.1919  | 0.2523  | -1.3018 |         |
| prad_stage | TCGA-CH-5751-01 | 0.0102 | 0.0102 | -0.2066 | 0.5146  | -1.3451 | -1.3451 | 0.3323  | -0.0276 | -0.0326 | -0.0446 | -0.5122 | -0.7119 | -0.8392 | -0.5215 | -0.5085 | 0.3391  | 0.3126  | -0.4936 |         |
| prad_stage | TCGA-HP-A68X-01 | 0.0049 | 0.0049 | -0.7699 | -0.4449 | -0.0649 | -0.3865 | -0.0000 | -1.4447 | -0.0000 | -0.3002 | 1.2884  | -0.0000 | 0.0000  | 0.0000  | 0.1184  | -0.2351 | 0.6201  | 0.0338  | 0.0564  |
| prad_stage | TCGA-HP-7170-01 | 0.0049 | 0.0049 | 0.558   | -0.4157 | 0.8421  | 0.8956  | -0.0018 | 0.0000  | -0.0000 | -0.2007 | 0.1406  | 1.1368  | 0.8848  | 0.3613  | -0.1432 | -0.2828 | 0.6028  | 0.4204  | 0.0004  |
| prad_stage | TCGA-KC-A48B-01 | 0.0049 | 0.0049 | -0.3585 | -0.7162 | 0.9867  | 1.3295  | -0.0197 | 0.7023  | 0.3717  | 0.2275  | 0.9267  | 0.1490  | -0.0982 | 0.1685  | -0.2227 | -0.3268 | 0.1942  | 0.4807  | 0.0000  |
| prad_stage | TCGA-G9-6376-01 | 0.0049 | 0.0049 | 0.7028  | 0.4752  | -0.3918 | -0.7973 | -0.5018 | 0.7337  | -0.3536 | -0.1481 | 0.0338  | 0.2978  | 0.6591  | -0.1591 | -0.7036 | -0.5466 | 1.0237  | -0.358  | 0.6001  |
| prad_stage | TCGA-HP-7168-01 | 0.0049 | 0.0049 | -0.6201 | -0.4242 | -0.2249 | -1.4638 | -0.1116 | -0.1964 | -0.5405 | -0.0711 | 0.1941  | 1.0334  | -0.2341 | -0.6368 | 0.2828  | -0.1344 | 0.096   | 0.2048  | 0.1039  |
| prad_stage | TCGA-G9-6365-01 | 0.0049 | 0.0049 | -0.8621 | 1.0367  | 0.7963  | -0.1248 | -0.9175 | 1.2977  | 1.0771  | 0.0000  | 1.0073  | 0.4757  | 1.3348  | -0.0274 | 0.0683  | -0.0232 | 0.4871  | -0.1896 | 0.067   |
| prad_stage | TCGA-VN-A8B1-01 | 0.0049 | 0.0049 | -0.8756 | -0.3748 | -0.0000 | -0.0000 | -0.0000 | -0.0000 | -1.3671 | 1.0007  | -0.2394 | 1.2941  | -0.0000 | -1.3409 | 0.8076  | -0.0315 | 0.8694  | 0.9022  | 0.0000  |
| prad_stage | TCGA-FC-770B-01 | 0.0049 | 0.0049 | 0.3993  | 0.5809  | 0.2099  | 0.6248  | -0.0821 | 0.5117  | -0.2125 | -0.0373 | 1.2887  | 1.1344  | 0.2945  | 0.0962  | -0.4442 | -0.4    | 0.6723  | -0.0346 | 0.3336  |
| prad_stage | TCGA-Z6-A9L6-01 | 0.0049 | 0.0049 | 0.3081  | -0.3652 | 0.0000  | 0.6482  | 0.1113  | 0.2868  | -0.0000 | 0.1611  | -0.7493 | 0.5285  | -0.3573 | 0.4533  | -0.4625 | -0.1355 | 0.7051  | 0.2129  | 0.4581  |
| prad_stage | TCGA-KK-A8B1-01 | 0.0049 | 0.0049 | 0.0000  | -0.4441 | -0.2145 | 0.5463  | -1.3216 | 0.3745  | -0.3028 | 0.4729  | 0.0000  | 1.2884  | 0.0000  | -0.0132 | 0.0000  | -0.223  | -0.1946 | -0.3678 | 0.0318  |
| prad_stage | TCGA-YL-A9W1-01 | 0.0049 | 0.0049 | 0.3908  | 0.0000  | 0.1112  | -0.3392 | 0.0341  | 0.3863  | 1.2001  | 0.3048  | 0.977   | 0.2233  | 0.7116  | 0.0000  | 0.5525  | -0.9297 | 0.297   | -0.0894 | 0.0000  |
| prad_stage | TCGA-CH-5792-01 | 0.0049 | 0.0049 | 0.4884  | -0.42   | 1.1549  | 1.2577  | 1.4448  | 0.2163  | -0.9403 | 0.0625  | -0.1043 | 0.7895  | -0.6434 | 0.607   | 1.1348  | -0.3385 | -0.2505 | 0.2876  | -0.2541 |
| prad_stage | TCGA-HP-7745-01 | 0.0049 | 0.0049 | 0.1043  | 0.183   | 0.0000  | 0.4411  | 0.115   | -0.1089 | -1.347  | 1.0000  | 0.1206  | 0.2776  | 0.0000  | 0.0000  | 0.0000  | -0.2803 | -0.0294 | 0.3495  | -0.6122 |
| prad_stage | TCGA-KK-A8A-01  | 0.0049 | 0.0049 | -0.799  | -1.0832 | 1.0832  | 1.3444  | 0.3867  | 1.0664  | 0.0000  | -0.2375 | 0.1521  | 1.2527  | 0.0000  | 0.8885  | -0.2095 | 0.9642  | 0.872   | -0.0326 | 0.071   |
| prad_stage | TCGA-J4-A677-01 | 0.0049 | 0.0049 | -0.4306 | 0.5235  | -0.6888 | -0.9041 | -0.2865 | 0.6134  | 0.1984  | 0.1968  | 0.0000  | -1.3796 | 1.8412  | -0.0934 | 0.5841  | -0.4282 | 0.3709  | -0.1897 | -0.2383 |
| prad_stage | TCGA-J4-AATV-01 | 0.0049 | 0.0049 | -0.5672 | -0.1881 | 0.5046  | -0.4125 | -0.0397 | 0.665   | 0.0414  | -0.0545 | 0.0000  | -0.1458 | 0.0908  | 1.3428  | 0.5829  | -0.4283 | 0.4247  | -0.1933 | 0.0961  |
| prad_stage | TCGA-HP-7818-01 | 0.0049 | 0.0049 | 0.6754  | 0.1586  | 0.4044  | -0.1361 | 0.8065  | -0.0088 | 0.0734  | 0.1135  | 0.0000  | -0.2555 | -0.3635 | 0.0019  | -0.2886 | -0.4561 | -0.2501 | 0.1972  | 0.0981  |
| prad_stage | TCGA-CH-5771-01 | 0.0049 | 0.0049 | 0.4503  | -0.9163 | -0.0000 | -0.0000 | 1.3557  | 0.7152  | -0.3805 | -0.0000 | -0.1015 | 0.1345  | -1.2917 | -0.0000 | -0.0000 | -0.3609 | 0.0000  | 0.1441  | -0.4073 |
| prad_stage | TCGA-HP-7079-01 | 0.0049 | 0.0049 | -0.4026 | -0.422  | -0.0000 | -0.0000 | 1.0014  | 1.1167  | 0.0211  | -1.218  | 0.4612  | -0.3744 | -0.5174 | 1.0000  | 0.6999  | 0.0345  | 0.4546  | 0.0913  | 0.0794  |
| prad_stage | TCGA-EJ-5903-01 | 0.0049 | 0.0049 | -0.5899 | -0.1052 | 1.188   | 0.0564  | 1.4444  | 1.099   | 0.2933  | -0.1053 | 1.1041  | 1.948   | -0.4244 | 0.0000  | 0.1088  | -0.4011 | 0.5728  | -0.1617 | -0.044  |
| prad_stage | TCGA-YL-A9W1-01 | 0.0049 | 0.0049 | -0.4504 | 0.0044  | 0.2539  | 0.904   | -0.3068 | 0.4938  | 0.8441  | 0.2101  | -0.1813 | 0.6881  | 0.3607  | -0.2467 | 0.2932  | 0.5163  | -0.313  | 0.5513  | 0.3468  |
| prad_stage | TCGA-G9-6336-01 | 0.0049 | 0.0049 | 0.7767  | 0.3303  | 0.0521  | -0.3822 | -0.3895 | 0.2881  | -1.138  | 0.7783  | 0.7841  | -0.0926 | -0.8844 | 1.3376  | 0.1819  | -0.4316 | 0.5127  | -0.371  | 0.8181  |
| prad_stage | TCGA-G9-6369-01 | 0.0049 | 0.0049 | -0.3077 | 0.2564  | 1.0000  | 0.3336  | 0.3491  | 0.2768  | 1.4008  | 1.0108  | 0.9485  | 0.5727  | -0.7735 | 1.4013  | 0.0000  | -0.3441 | -0.3208 | -0.1041 | 0.3881  |
| prad_stage | TCGA-V1-A8WJ-01 | 0.0049 | 0.0049 | -0.8646 | -0.3635 | 0.2074  | 0.8234  | -0.5207 | 0.1254  | -0.3648 | 0.5007  | 0.0376  | 0.1386  | 0.0000  | 0.284   | 0.4643  | 0.1569  | 0.293   | 0.4081  | 0.1440  |
| prad_stage | TCGA-YL-A8HD-01 | 0.0049 | 0.0049 | 0.46    | -0.4111 | 0.0000  | 0.2482  | -0.4111 | 0.0000  | -1.3419 | 0.6756  | -0.9333 | 0.6756  | -0.6844 | 0.7279  | -0.1238 | 0.0000  | 0.5685  | 0.475   | -0.4407 |
| prad_stage | TCGA-KC-5738-01 | 0.0049 | 0.0049 | 0.5281  | -0.4439 | 0.1158  | -0.3147 | 0.6658  | 0.9105  | -0.4282 | -0.3336 | 0.0000  | -0.1815 | -0.3094 | -0.301  | 0.2935  | -0.4489 | 0.3043  | -0.2973 | 0.2939  |
| prad_stage | TCGA-CH-5769-01 | 0.0049 | 0.0049 | -0.1246 | 0.8875  | 0.6249  | 0.058   | 0.6305  | 0.3883  | 0.2043  | 0.6448  | 0.2495  | -0.0708 | 0.6662  | -0.1473 | -0.3468 | -0.4452 | -0.1033 | 0.254   | 0.6648  |
| prad_stage | TCGA-EJ-7794-01 | 0.0049 | 0.0049 | -0.0000 | -0.4678 | 0.7836  | 0.0335  | 0.2713  | 0.1487  | -0.1437 | -0.1346 | -0.3199 | 0.6636  | 0.0000  | -0.0157 | -0.1358 | 0.0702  | -0.1677 | -0.1066 | 0.1289  |
| prad_stage | TCGA-Z6-A9L6-01 | 0.0049 | 0.0049 | -0.275  | -0.784  | 0.46    | 0.3038  | 0.7313  | 0.2412  | 0.7113  | 0.4735  | -0.3033 | 1.3943  | 0.0000  | -0.3346 | 1.362   | 0.2751  | 0.4029  | 0.9569  | -0.2381 |
| prad_stage | TCGA-KK-A8B1-01 | 0.0049 | 0.0049 | 0.8011  | -0.4994 | 0.9046  | -0.1108 | -0.4888 | -0.3228 | -0.4347 | 0.2039  | 0.7873  | 1.2648  | 0.3912  | 0.2048  | 0.6411  | -0.2736 | -0.5142 | -0.3123 | 0.2855  |
| prad_stage | TCGA-EJ-A8B9-01 | 0.0049 | 0.0049 | -0.7113 | -0.4133 | 0.3133  | 0.2637  | 0.0182  | 0.3277  | 1.5643  | 0.851   | -0.0795 | 0.0000  | -0.4518 | 0.0000  | 0.6238  | -0.4705 | 0.5266  | 0.416   | 0.4882  |
| prad_stage | TCGA-KC-7231-01 | 0.0049 | 0.0049 | 0.5242  | 0.3043  | -0.1994 | 0.2743  | 0.5355  | 0.0557  | 0.2548  | 0.8641  | -0.2245 | -0.5181 | 0.8848  | -0.254  | 0.1114  | -0.3171 | 0.989   | -0.0121 | 0.4202  |
| prad_stage | TCGA-Z6-A8V1-01 | 0.0049 | 0.0049 | -0.7805 | 0.0000  | -0.7048 | -0.2931 | -0.6434 | 0.2608  | 0.3303  | 0.0000  | 1.3318  | 1.9409  | -0.0732 | -0.8361 | 0.5836  | -0.361  | 1.2111  | -0.0937 | 0.3595  |
| prad_stage | TCGA-EJ-5902-01 | 0.0049 | 0.0049 | 0.7503  | 0.4092  | 1.2188  | 0.0226  | 1.2188  | 0.0000  | -0.4306 | 0.7569  | 0.8888  | 1.3888  | 0.8838  | 0.375   | -0.2948 | -0.0636 | -0.1854 | 0.077   | 1.6164  |
| prad_stage | TCGA-Z6-A9M4-01 | 0.0049 | 0.0049 | 0.3609  | 0.2387  | 0.9167  | 0.0000  | 0.4417  | 0.425   | -0.1889 | 0.7958  | 0.7266  | 0.4624  | -0.3939 | 0.9272  | 0.0000  | -0.2543 | -0.0956 | 0.3796  | 0.6202  |
| prad_stage | TCGA-KC-A502-01 | 0.0049 | 0.0049 | -0.3342 | -0.4362 | -0.0005 | 0.4007  | -0.7495 | -0.2495 | 0.777   | 0.5844  | -0.5037 | 0.4672  | -0.2443 | -0.1816 | 0.7100  | -0.4123 | -0.1408 | -0.099  | 0.5711  |
| prad_stage | TCGA-EJ-5909-01 | 0.0049 | 0.0049 | -0.0000 | -0.4635 | 0.3417  | 0.415   | 0.8983  | -0.1965 | -0.2779 | -0.3387 | 0.1952  | 0.0000  | -0.4899 | -0.3555 | -0.2043 | 0.3881  | -0.3046 | -0.1581 | 0.5743  |
| prad_stage | TCGA-KC-7742-01 | 0.0049 | 0.0049 | 0.2608  | -0.4599 | -0.1769 | 0.7467  | 0.8196  | 0.2875  | -0.9006 | 0.416   | -0.1121 | 0.1246  | -0.0107 | -0.3581 | 0.3268  | 1.1134  | 0.5031  | 0.9001  | 0.3218  |
| prad_stage | TCGA-CH-5763-01 | 0.0049 | 0.0049 | 0.2718  | -0.4633 | 0.6108  | -0.308  | 0.7302  | 0.0239  | -1.6299 | 0.4301  | 0.0000  | -0.4446 | -0.0304 | 0.147   | 0.103   | -0.3411 | 0.2931  | -0.1703 | -0.3478 |
| prad_stage | TCGA-V1-A8WJ-01 | 0.0049 | 0.0049 | 0.4029  | -0.1277 | 0.1332  | -0.4037 | -0.4238 | -0.2071 | -0.8113 | 0.175   | -0.3643 | 0.1252  | -0.0251 | 0.5322  | -0.2694 | -0.3701 | -0.0844 | 0.2028  | 0.3569  |
| prad_stage | TCGA-KC-7230-01 | 0.0049 | 0.0049 | -0.469  | -0.4272 | 0.4741  | 0.1639  | 0.3196  | 0.4201  | -0.2549 | 0.8672  | -0.3338 | -0.162  | -0.7138 | -0.532  | -0.2944 | -0.3305 | 0.1718  | -0.1561 | 0.5094  |
| prad_stage | TCGA-EJ-5949-01 | 0.0049 | 0.0049 | -0.1466 | 1.0025  | 0.4372  | 0.0416  | 0.436   | 0.3674  | 0.3193  | 0.8193  | 0.3877  | 1.2663  | -0.6011 | 0.2548  | 0.4209  | -0.2559 | 0.4828  | -0.0803 | 0.1894  |
| prad_stage | TCGA-FC-A8D0-01 | 0.0049 | 0.0049 | 0.6853  | -0.5045 | 0.0000  | -0.3755 | 0.5204  | 0.5204  | -0.5811 | 0.0000  | -0.2475 | 0.0000  | -0.6728 | 0.0000  | 0.5812  | 0.0000  | 0.4153  | -0.3028 | 0.6078  |
| prad_stage | TCGA-HP-7818-01 | 0.00   |        |         |         |         |         |         |         |         |         |         |         |         |         |         |         |         |         |         |

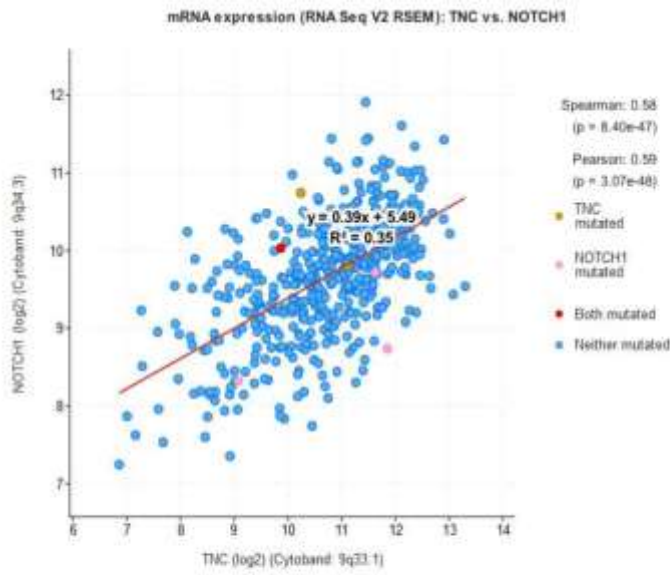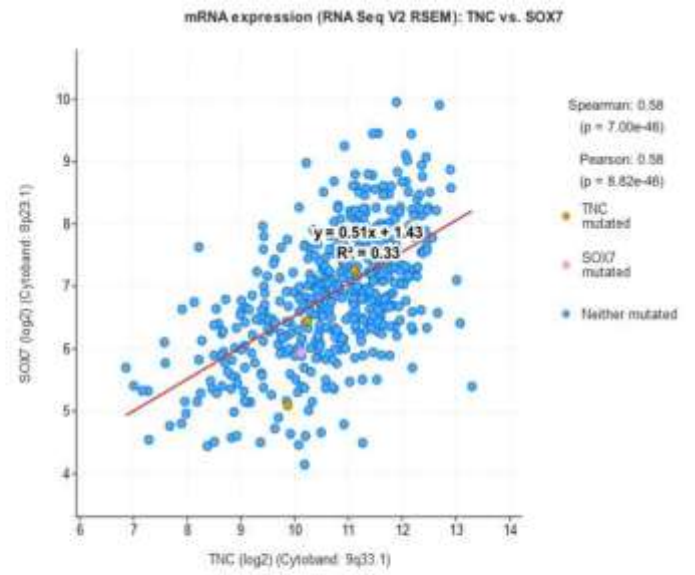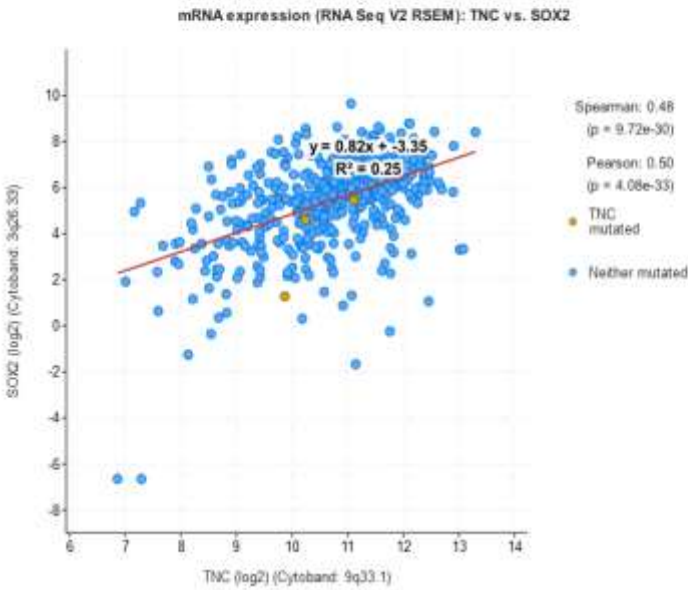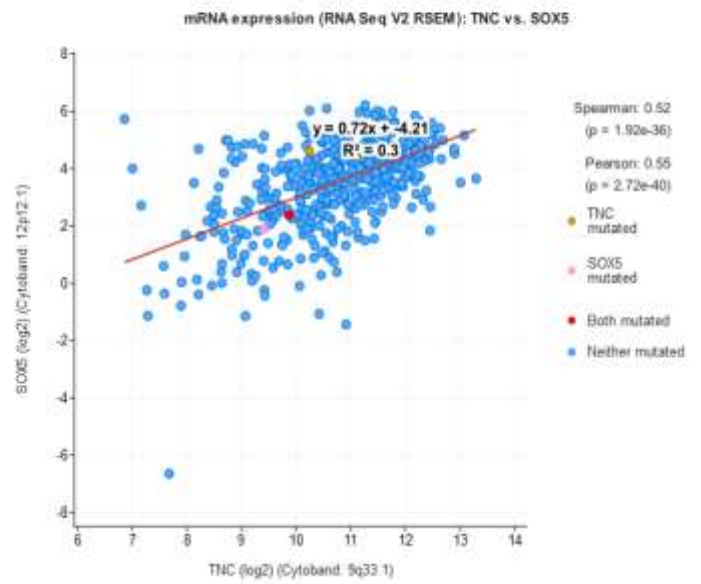

Supplementary Figure 3: Correlation analysis of TNC and de-differentiation markers

**Supplementary Table 1: List of genes showing significant co-occurrence with TNC in NEPC dataset**

| Gene      | Cytoband        | Samples with alteration in TNC altered group | Samples with alteration in unaltered group | Log Ratio | p-Value  | q-Value  | Tendency      |
|-----------|-----------------|----------------------------------------------|--------------------------------------------|-----------|----------|----------|---------------|
| NOTCH1    | 9q34.3          | 22 (84.62%)                                  | 2 (2.47%)                                  | 5.1       | 9.71E-17 | 7.22E-15 | Co-occurrence |
| NOTCH3    | 19p13.12        | 16 (61.54%)                                  | 4 (4.94%)                                  | 3.64      | 3.81E-09 | 2.99E-08 | Co-occurrence |
| NOTCH2    | 1p12            | 16 (61.54%)                                  | 5 (6.17%)                                  | 3.32      | 1.43E-08 | 7.82E-08 | Co-occurrence |
| NOTCH2NLA | 1q21.1          | 17 (65.38%)                                  | 9 (11.11%)                                 | 2.56      | 1.65E-07 | 5.18E-07 | Co-occurrence |
| NOTCH4    | 6p21.32         | 11 (42.31%)                                  | 5 (6.17%)                                  | 2.78      | 4.96E-05 | 7.29E-05 | Co-occurrence |
| QSOX2     | 9q34.3          | 21 (80.77%)                                  | 2 (2.47%)                                  | 5.03      | 1.50E-15 | 6.79E-14 | Co-occurrence |
| SOX9      | 17q24.3         | 19 (73.08%)                                  | 3 (3.70%)                                  | 4.3       | 1.47E-12 | 3.85E-11 | Co-occurrence |
| SOX14     | 3q22.3          | 17 (65.38%)                                  | 6 (7.41%)                                  | 3.14      | 7.37E-09 | 4.57E-08 | Co-occurrence |
| SOX2      | 3q26.33         | 17 (65.38%)                                  | 7 (8.64%)                                  | 2.92      | 2.27E-08 | 1.16E-07 | Co-occurrence |
| SOX13     | 1q32.1          | 19 (73.08%)                                  | 12 (14.81%)                                | 2.3       | 6.25E-08 | 2.39E-07 | Co-occurrence |
| SOX3      | Xq27.1          | 18 (69.23%)                                  | 10 (12.35%)                                | 2.49      | 6.92E-08 | 2.54E-07 | Co-occurrence |
| SOX30     | 5q33.3          | 15 (57.69%)                                  | 5 (6.17%)                                  | 3.22      | 8.66E-08 | 3.06E-07 | Co-occurrence |
| SOX8      | 16p13.3         | 14 (53.85%)                                  | 4 (4.94%)                                  | 3.45      | 1.44E-07 | 4.66E-07 | Co-occurrence |
| QSOX1     | 1q25.2          | 18 (69.23%)                                  | 11 (13.58%)                                | 2.35      | 1.65E-07 | 5.18E-07 | Co-occurrence |
| SOX12     | 20p13           | 15 (57.69%)                                  | 7 (8.64%)                                  | 2.74      | 7.40E-07 | 1.90E-06 | Co-occurrence |
| SOX18     | 20q13.33        | 17 (65.38%)                                  | 11 (13.58%)                                | 2.27      | 9.12E-07 | 2.22E-06 | Co-occurrence |
| SOX4      | 6p22.3          | 12 (46.15%)                                  | 4 (4.94%)                                  | 3.22      | 3.92E-06 | 7.65E-06 | Co-occurrence |
| SOX5      | 12p12.1         | 9 (34.62%)                                   | 3 (3.70%)                                  | 3.22      | 1.15E-04 | 1.61E-04 | Co-occurrence |
| SOX6      | 11p15.2         | 8 (30.77%)                                   | 2 (2.47%)                                  | 3.64      | 1.51E-04 | 2.05E-04 | Co-occurrence |
| SOX11     | 2p25.2          | 10 (38.46%)                                  | 6 (7.41%)                                  | 2.38      | 4.47E-04 | 5.75E-04 | Co-occurrence |
| SOX10     | 22q13.1         | 6 (23.08%)                                   | 1 (1.23%)                                  | 4.22      | 7.40E-04 | 8.89E-04 | Co-occurrence |
| SOX21     | 13q32.1         | 7 (26.92%)                                   | 3 (3.70%)                                  | 2.86      | 1.75E-03 | 2.05E-03 | Co-occurrence |
| SOX17     | 8q11.23         | 15 (57.69%)                                  | 20 (24.69%)                                | 1.22      | 2.37E-03 | 2.78E-03 | Co-occurrence |
| SOX1      | 13q34           | 8 (30.77%)                                   | 6 (7.41%)                                  | 2.05      | 4.91E-03 | 5.52E-03 | Co-occurrence |
| SOX7      | 8p23.1          | 6 (23.08%)                                   | 3 (3.70%)                                  | 2.64      | 6.11E-03 | 6.82E-03 | Co-occurrence |
| SOX15     | 17p13.1         | 3 (11.54%)                                   | 0 (0.00%)                                  | >10       | 0.0131   | 0.0142   | Co-occurrence |
| WNT7A     | 3p25.1          | 20 (76.92%)                                  | 4 (4.94%)                                  | 3.96      | 7.76E-13 | 2.36E-11 | Co-occurrence |
| WNT5A     | 3p14.3          | 20 (76.92%)                                  | 5 (6.17%)                                  | 3.64      | 3.61E-12 | 9.21E-11 | Co-occurrence |
| WNT3      | 17q21.31-q21.32 | 18 (69.23%)                                  | 3 (3.70%)                                  | 4.22      | 1.37E-11 | 2.81E-10 | Co-occurrence |
| WNT9B     | 17q21.32        | 18 (69.23%)                                  | 3 (3.70%)                                  | 4.22      | 1.37E-11 | 2.81E-10 | Co-occurrence |
| WNT3A     | 1q42.13         | 18 (69.23%)                                  | 6 (7.41%)                                  | 3.22      | 1.05E-09 | 1.14E-08 | Co-occurrence |
| WNT9A     | 1q42.13         | 18 (69.23%)                                  | 6 (7.41%)                                  | 3.22      | 1.05E-09 | 1.14E-08 | Co-occurrence |
| WNT1      | 12q13.12        | 13 (50.00%)                                  | 1 (1.23%)                                  | 5.34      | 7.01E-09 | 4.57E-08 | Co-occurrence |
| WNT10B    | 12q13.12        | 13 (50.00%)                                  | 1 (1.23%)                                  | 5.34      | 7.01E-09 | 4.57E-08 | Co-occurrence |
| WNT11     | 11q13.5         | 17 (65.38%)                                  | 6 (7.41%)                                  | 3.14      | 7.37E-09 | 4.57E-08 | Co-occurrence |
| WNT8A     | 5q31.2          | 13 (50.00%)                                  | 3 (3.70%)                                  | 3.75      | 2.12E-07 | 6.31E-07 | Co-occurrence |
| WNT2B     | 1p13.2          | 10 (38.46%)                                  | 2 (2.47%)                                  | 3.96      | 7.20E-06 | 1.29E-05 | Co-occurrence |
| WNT8B     | 10q24.31        | 9 (34.62%)                                   | 2 (2.47%)                                  | 3.81      | 3.41E-05 | 5.26E-05 | Co-occurrence |
| WNT2      | 7q31.2          | 12 (46.15%)                                  | 8 (9.88%)                                  | 2.22      | 1.46E-04 | 2.02E-04 | Co-occurrence |
| WNT4      | 1p36.12         | 5 (19.23%)                                   | 0 (0.00%)                                  | >10       | 6.19E-04 | 7.75E-04 | Co-occurrence |
| WNT10A    | 2q35            | 7 (26.92%)                                   | 2 (2.47%)                                  | 3.45      | 6.31E-04 | 7.76E-04 | Co-occurrence |
| WNT6      | 2q35            | 7 (26.92%)                                   | 2 (2.47%)                                  | 3.45      | 6.31E-04 | 7.76E-04 | Co-occurrence |

|         |          |             |             |      |          |          |               |
|---------|----------|-------------|-------------|------|----------|----------|---------------|
| WNT5B   | 12p13.33 | 9 (34.62%)  | 5 (6.17%)   | 2.49 | 7.37E-04 | 8.89E-04 | Co-occurrence |
| WNT16   | 7q31.31  | 11 (42.31%) | 11 (13.58%) | 1.64 | 2.97E-03 | 3.40E-03 | Co-occurrence |
| WNT7B   | 22q13.31 | 3 (11.54%)  | 0 (0.00%)   | >10  | 0.0131   | 0.0142   | Co-occurrence |
| FZD6    | 8q22.3   | 24 (92.31%) | 20 (24.69%) | 1.9  | 6.73E-10 | 8.59E-09 | Co-occurrence |
| FZD2    | 17q21.31 | 15 (57.69%) | 3 (3.70%)   | 3.96 | 5.83E-09 | 4.32E-08 | Co-occurrence |
| FZD1    | 7q21.13  | 16 (61.54%) | 6 (7.41%)   | 3.05 | 4.66E-08 | 1.81E-07 | Co-occurrence |
| FZD4    | 11q14.2  | 15 (57.69%) | 7 (8.64%)   | 2.74 | 7.40E-07 | 1.90E-06 | Co-occurrence |
| FZD9    | 7q11.23  | 14 (53.85%) | 7 (8.64%)   | 2.64 | 3.66E-06 | 7.34E-06 | Co-occurrence |
| FZD5    | 2q33.3   | 9 (34.62%)  | 2 (2.47%)   | 3.81 | 3.41E-05 | 5.26E-05 | Co-occurrence |
| FZD7    | 2q33.1   | 9 (34.62%)  | 2 (2.47%)   | 3.81 | 3.41E-05 | 5.26E-05 | Co-occurrence |
| FZD8    | 10p11.21 | 7 (26.92%)  | 1 (1.23%)   | 4.45 | 1.68E-04 | 2.24E-04 | Co-occurrence |
| FZD10   | 12q24.33 | 7 (26.92%)  | 5 (6.17%)   | 2.12 | 7.96E-03 | 8.87E-03 | Co-occurrence |
| MSI2    | 17q22    | 18 (69.23%) | 4 (4.94%)   | 3.81 | 6.86E-11 | 1.21E-09 | Co-occurrence |
| MSI1    | 12q24.31 | 10 (38.46%) | 8 (9.88%)   | 1.96 | 1.73E-03 | 2.05E-03 | Co-occurrence |
| NANOG   | 12p13.31 | 9 (34.62%)  | 2 (2.47%)   | 3.81 | 3.41E-05 | 5.26E-05 | Co-occurrence |
| NANOGNB | 12p13.31 | 9 (34.62%)  | 2 (2.47%)   | 3.81 | 3.41E-05 | 5.26E-05 | Co-occurrence |
| LRG1    | 19p13.3  | 14 (53.85%) | 1 (1.23%)   | 5.45 | 1.05E-09 | 1.14E-08 | Co-occurrence |
| LRGUK   | 7q33     | 13 (50.00%) | 8 (9.88%)   | 2.34 | 3.74E-05 | 5.61E-05 | Co-occurrence |
| KLRG1   | 12p13.31 | 8 (30.77%)  | 2 (2.47%)   | 3.64 | 1.51E-04 | 2.05E-04 | Co-occurrence |
| KLRG2   | 7q34     | 13 (50.00%) | 10 (12.35%) | 2.02 | 1.56E-04 | 2.11E-04 | Co-occurrence |
| PLRG1   | 4q31.3   | 9 (34.62%)  | 4 (4.94%)   | 2.81 | 3.13E-04 | 4.06E-04 | Co-occurrence |
